# Supplementary material
Source: MDPI journal article supplement (https://www.mdpi.com/2311-7524/9/11/1185)
Supplement: s1 [file s1]

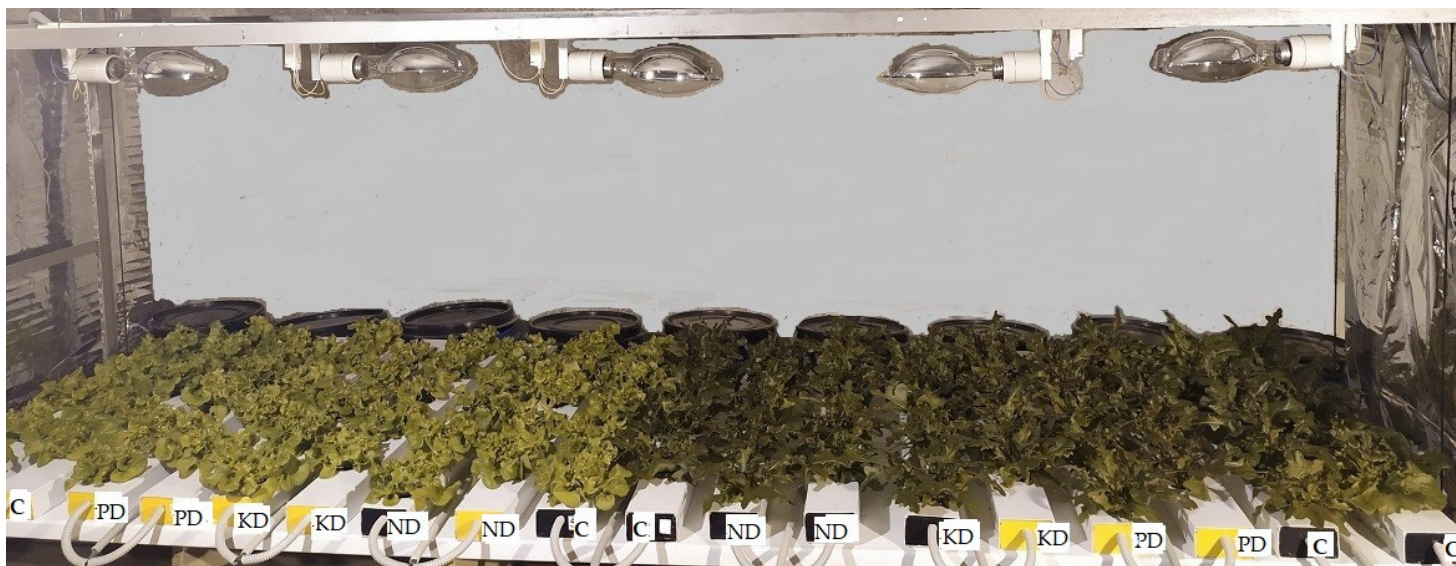

Figure 1. Plant growing light equipment with lettuce plants, growing by the Nutrient Film Technique. C – Control (Complete Knop nutrient solution), ND – Nitrogen deficiency, PD – Phosphorus deficiency, KD – Potassium deficiency. Cultivars are used: Kokarda (on the right), Vitaminnyi (on the left)
