# Supplementary material
Source: MDPI journal article supplement (https://www.mdpi.com/2311-7524/9/11/1185)
Supplement: s1 [file s1]

Archive with 5 entries (5 files):
- Figure 1. Plant growing light equipment  with lettuce plants, growing by the Nutrient Film Technique.pdf
- Table S1. Reflectance indices of lettuce plants grown under optimal nutrition and under the deficiency of one of the macronutrients (day 21 of vegetat.pdf
- Table S2. Reflectance indices of lettuce plants grown with optimal nutrition and under the deficiency of one of the macronutrients (day 28 of vegetati.pdf
- Table S3. Fluorescence parameters of lettuce leaves withr optimal plant nutrition and under nitrogen, phosphorus or potassium deficiency (day 21 of ve.pdf
- Table S4. Fluorescence parameters of lettuce leaves withr optimal plant nutrition and under nitrogen, phosphorus or potassium deficiency (day 28 of ve.pdf
