# Supplementary material
Source: MDPI journal article supplement (https://www.mdpi.com/2311-7524/9/11/1185)
Supplement: s1 [file s1]

**Table S3.** Fluorescence parameters of lettuce leaves withr optimal plant nutrition and under nitrogen, phosphorus or potassium deficiency (day 21 of vegetation).

| FL                  | Control |       | ND    |       | PD    |       | KD    |       |
|---------------------|---------|-------|-------|-------|-------|-------|-------|-------|
|                     | M       | SEM   | M     | SEM   | M     | SEM   | M     | SEM   |
| <b>‘Vitaminnyi’</b> |         |       |       |       |       |       |       |       |
| F                   | 1656    | 101   | 1828  | 59    | 1501  | 101   | 1385  | 61    |
| Fm'                 | 1920    | 74    | 1958  | 55    | 1668  | 100   | 1584  | 56    |
| Y(II)               | 0.141   | 0.021 | 0.067 | 0.008 | 0.104 | 0.018 | 0.127 | 0.014 |
| Fo'                 | 351     | 7.9   | 322   | 10.5  | 309   | 12.1  | 267   | 10.0  |
| qP                  | 0.174   | 0.027 | 0.080 | 0.009 | 0.130 | 0.026 | 0.152 | 0.018 |
| qN                  | 0.045   | 0.006 | 0.020 | 0.007 | 0.046 | 0.01  | 0.045 | 0.009 |
| qL                  | 0.039   | 0.008 | 0.014 | 0.002 | 0.030 | 0.009 | 0.030 | 0.004 |
| NPQ                 | 0.040   | 0.005 | 0.018 | 0.006 | 0.040 | 0.009 | 0.041 | 0.008 |
| Y(NO)               | 0.826   | 0.024 | 0.917 | 0.009 | 0.863 | 0.023 | 0.840 | 0.018 |
| Y(NPQ)              | 0.033   | 0.004 | 0.016 | 0.005 | 0.034 | 0.007 | 0.034 | 0.007 |
| Fo                  | 353     | 7.9   | 323   | 10.8  | 311   | 12.6  | 269   | 10.1  |
| Fm                  | 1995    | 70.3  | 1993  | 57.6  | 1732  | 94.6  | 1647  | 47.7  |
| Fv/Fm               | 0.822   | 0.008 | 0.838 | 0.003 | 0.816 | 0.019 | 0.837 | 0.004 |
| <b>‘Kokarda’</b>    |         |       |       |       |       |       |       |       |
| F                   | 1611    | 87    | 1869  | 85    | 1756  | 40    | 1923  | 43    |
| Fm'                 | 1907    | 81    | 2017  | 83    | 1896  | 52    | 2061  | 39    |
| Y(II)               | 0.157   | 0.014 | 0.074 | 0.006 | 0.069 | 0.007 | 0.068 | 0.004 |
| Fo'                 | 350     | 17.5  | 352   | 13.0  | 337   | 6.5   | 358   | 8.96  |
| qP                  | 0.193   | 0.018 | 0.090 | 0.008 | 0.08  | 0.009 | 0.082 | 0.005 |
| qN                  | 0.043   | 0.002 | 0.026 | 0.005 | 0.014 | 0.007 | 0.019 | 0.010 |
| qL                  | 0.043   | 0.005 | 0.017 | 0.002 | 0.016 | 0.002 | 0.015 | 0.001 |
| NPQ                 | 0.038   | 0.001 | 0.023 | 0.004 | 0.012 | 0.007 | 0.017 | 0.008 |
| Y(NO)               | 0.813   | 0.014 | 0.905 | 0.009 | 0.920 | 0.013 | 0.917 | 0.011 |
| Y(NPQ)              | 0.031   | 0.001 | 0.020 | 0.004 | 0.011 | 0.006 | 0.015 | 0.007 |
| Fo                  | 352     | 17.6  | 353   | 12.8  | 338   | 6.6   | 359   | 9.0   |
| Fm                  | 1979    | 85.1  | 2062  | 79.6  | 1919  | 55.0  | 2095  | 36.6  |
| Fv/Fm               | 0.822   | 0.006 | 0.828 | 0.005 | 0.823 | 0.005 | 0.828 | 0.004 |

Note. M denotes fluorescence parameters mean values. SEM is the standard error of the means
