# Supplementary material
Source: MDPI journal article supplement (https://www.mdpi.com/2311-7524/9/11/1185)
Supplement: s1 [file s1 › Table S1. Reflectance indices of lettuce plants grown under optimal nutrition and under the deficiency of one of the macronutrients (day 21 of vegetat.pdf]

**Table S1.** Reflectance indices of lettuce plants grown under optimal nutrition and under the deficiency of one of the macronutrients (day 21 of vegetation).

| Reflectance index   | C               | ND            | PD            | KD            |
|---------------------|-----------------|---------------|---------------|---------------|
| <b>‘Vitaminnyi’</b> |                 |               |               |               |
| ChlRI               | 0.354 ± 0.010 * | 0.237 ± 0.009 | 0.280 ± 0.006 | 0.297 ± 0.008 |
| SIPI                | 1.007 ± 0.001   | 1.046 ± 0.004 | 1.022 ± 0.432 | 1.016 ± 0.004 |
| R <sub>800</sub>    | 34.8 ± 0.68     | 31.4 ± 0.76   | 31.8 ± 0.635  | 34.7 ± 0.849  |
| PRI                 | 0.801 ± 0.02    | 0.912 ± 0.01  | 0.924 ± 0.016 | 0.888 ± 0.016 |
| ARI                 | 0.394 ± 0.038   | 0.732 ± 0.016 | 0.631 ± 0.013 | 0.532 ± 0.016 |
| <b>‘Kokarda’</b>    |                 |               |               |               |
| ChlRI               | 0.526 ± 0.005   | 0.408 ± 0.010 | 0.458 ± 0.006 | 0.451 ± 0.009 |
| SIPI                | 1.001 ± 0.001   | 1.001 ± 0.001 | 1.005 ± 0.003 | 1.007 ± 0.004 |
| R <sub>800</sub>    | 36.8 ± 0.607    | 34.4 ± 0.448  | 39.0 ± 0.003  | 35.5 ± 0.064  |
| PRI                 | 0.845 ± 0.003   | 0.936 ± 0.03  | 0.934 ± 0.023 | 0.909 ± 0.020 |
| ARI                 | 1.259 ± 0.140   | 1.228 ± 0.092 | 1.459 ± 0.986 | 1.512 ± 0.129 |

\* Mean values of reflectance indices and standard errors of their determination (± SEM) are given.
