# Supplementary material
Source: MDPI journal article supplement (https://www.mdpi.com/2311-7524/9/11/1185)
Supplement: s1 [file s1 › Table S2. Reflectance indices of lettuce plants grown with optimal nutrition and under the deficiency of one of the macronutrients (day 28 of vegetati.pdf]

**Table S2.** Reflectance indices of lettuce plants grown with optimal nutrition and under the deficiency of one of the macronutrients (day 28 of vegetation).

| Reflectance index   | Control       | ND            | PD            | KD            |
|---------------------|---------------|---------------|---------------|---------------|
| <b>‘Vitaminnyi’</b> |               |               |               |               |
| ChlRI               | 0.291 ± 0.026 | 0.248 ± 0.029 | 0.305 ± 0.023 | 0.301 ± 0.031 |
| SIPI                | 1.011 ± 0.002 | 1.018 ± 0.008 | 1.010 ± 0.004 | 1.010 ± 0.004 |
| R <sub>800</sub>    | 31.1 ± 1.93   | 33.0 ± 1.46   | 34.8 ± 3.22   | 32.5 ± 2.49   |
| PRI                 | 0.957 ± 0.085 | 0.961 ± 0.113 | 0.876 ± 0.087 | 0.867 ± 0.054 |
| ARI                 | 0.550 ± 0.082 | 0.680 ± 0.090 | 0.527 ± 0.073 | 0.539 ± 0.094 |
| <b>‘Kokarda’</b>    |               |               |               |               |
| ChlRI               | 0.513 ± 0.001 | 0.443 ± 0.007 | 0.512 ± 0.006 | 0.514 ± 0.009 |
| SIPI                | 1.002 ± 0.002 | 1.004 ± 0.001 | 1.006 ± 0.003 | 1.003 ± 0.001 |
| R <sub>800</sub>    | 35.0 ± 0.71   | 35.0 ± 0.84   | 35.7 ± 0.61   | 35.8 ± 0.75   |
| PRI                 | 0.796 ± 0.022 | 0.858 ± 0.019 | 0.878 ± 0.013 | 0.796 ± 0.033 |
| ARI                 | 0.695 ± 0.127 | 0.646 ± 0.078 | 0.741 ± 0.128 | 0.317 ± 0.182 |

Note. Reflectance indices mean values and standard errors of their determination (± SEM) are given.
