# Supplementary material
Source: MDPI journal article supplement (https://www.mdpi.com/2311-7524/9/11/1185)
Supplement: s1 [file s1 › Table S4. Fluorescence parameters of lettuce leaves withr optimal plant nutrition and under nitrogen, phosphorus or potassium deficiency (day 28 of ve.pdf]

**Table S4.** Fluorescence parameters of lettuce leaves with optimal plant nutrition and under nitrogen, phosphorus or potassium deficiency (day 28 of vegetation).

| FL                  | C     |       | ND    |       | PD    |       | KD    |       |
|---------------------|-------|-------|-------|-------|-------|-------|-------|-------|
|                     | M     | SEM   | M     | SEM   | M     | SEM   | M     | SEM   |
| <b>‘Vitaminnyi’</b> |       |       |       |       |       |       |       |       |
| <b>F</b>            | 1801  | 76    | 2238  | 167   | 1501  | 109   | 1832  | 129   |
| <b>Fm'</b>          | 1915  | 72    | 2297  | 158   | 1668  | 99    | 1928  | 121   |
| <b>Y(II)</b>        | 0.060 | 0.005 | 0.027 | 0.008 | 0.104 | 0.019 | 0.052 | 0.009 |
| <b>Fo'</b>          | 315   | 6.1   | 400   | 39.6  | 309   | 12.1  | 324   | 26.1  |
| <b>qP</b>           | 0.072 | 0.006 | 0.032 | 0.009 | 0.130 | 0.026 | 0.062 | 0.011 |
| <b>qN</b>           | 0.032 | 0.023 | 0.043 | 0.011 | 0.046 | 0.010 | 0.048 | 0.014 |
| <b>qL</b>           | 0.013 | 0.002 | 0.005 | 0.001 | 0.030 | 0.009 | 0.011 | 0.002 |
| <b>NPQ</b>          | 0.030 | 0.021 | 0.039 | 0.010 | 0.040 | 0.009 | 0.044 | 0.013 |
| <b>Y(NO)</b>        | 0.914 | 0.021 | 0.937 | 0.007 | 0.863 | 0.023 | 0.909 | 0.011 |
| <b>Y(NPQ)</b>       | 0.038 | 0.012 | 0.036 | 0.009 | 0.034 | 0.007 | 0.039 | 0.012 |
| <b>Fo</b>           | 317   | 5.28  | 403   | 40.2  | 311   | 12.6  | 327   | 26.8  |
| <b>Fm</b>           | 1973  | 85.1  | 2389  | 178.5 | 1732  | 94.6  | 2017  | 141.6 |
| <b>Fv/Fm</b>        | 0.838 | 0.008 | 0.833 | 0.007 | 0.816 | 0.019 | 0.838 | 0.003 |
| <b>‘Kokarda’</b>    |       |       |       |       |       |       |       |       |
| <b>F</b>            | 1688  | 50    | 2034  | 137   | 1751  | 38    | 1693  | 53    |
| <b>Fm'</b>          | 1813  | 48    | 2114  | 129   | 1868  | 32    | 1799  | 55    |
| <b>Y(II)</b>        | 0.069 | 0.008 | 0.039 | 0.007 | 0.063 | 0.007 | 0.059 | 0.002 |
| <b>Fo'</b>          | 329   | 11.3  | 385   | 25.1  | 337   | 11.0  | 291   | 10.4  |
| <b>qP</b>           | 0.084 | 0.009 | 0.048 | 0.009 | 0.076 | 0.008 | 0.071 | 0.003 |
| <b>qN</b>           | 0.046 | 0.004 | 0.052 | 0.017 | 0.038 | 0.009 | 0.056 | 0.010 |
| <b>qL</b>           | 0.016 | 0.002 | 0.009 | 0.002 | 0.015 | 0.001 | 0.012 | 0.001 |
| <b>NPQ</b>          | 0.040 | 0.004 | 0.048 | 0.018 | 0.034 | 0.009 | 0.051 | 0.009 |
| <b>Y(NO)</b>        | 0.895 | 0.009 | 0.918 | 0.011 | 0.907 | 0.012 | 0.895 | 0.008 |
| <b>Y(NPQ)</b>       | 0.036 | 0.003 | 0.043 | 0.016 | 0.03  | 0.008 | 0.046 | 0.008 |
| <b>Fo</b>           | 332   | 11.2  | 388   | 26.0  | 339   | 11.2  | 294   | 10.6  |
| <b>Fm</b>           | 1886  | 44.3  | 2218  | 151.9 | 1931  | 33.6  | 1890  | 44.7  |
| <b>Fv/Fm</b>        | 0.824 | 0.004 | 0.825 | 0.002 | 0.824 | 0.005 | 0.844 | 0.008 |

Note. M denotes fluorescence parameters mean values. SEM is the standard error of the means
